# Supplementary material for: Capsule-embedded reduced graphene oxide: synthesis, mechanism and electrical properties
Source: Royal Society of Chemistry journal article supplement (doi:10.1039/c2tc00304j), 2012-11-27
Supplement: c2tc00304j.pdf [file c2tc00304j.pdf]

# ESI

## Capsules-embedded reduced graphene oxide: Synthesis, mechanism and electrical properties

Y. N. Singhababu, K. K. Sahu, D. Dadhich, A. K. Pramanick, T. Mishra and R. K. Sahu\*

CSIR-National Metallurgical Laboratory, Jamshedpur, 831007, India

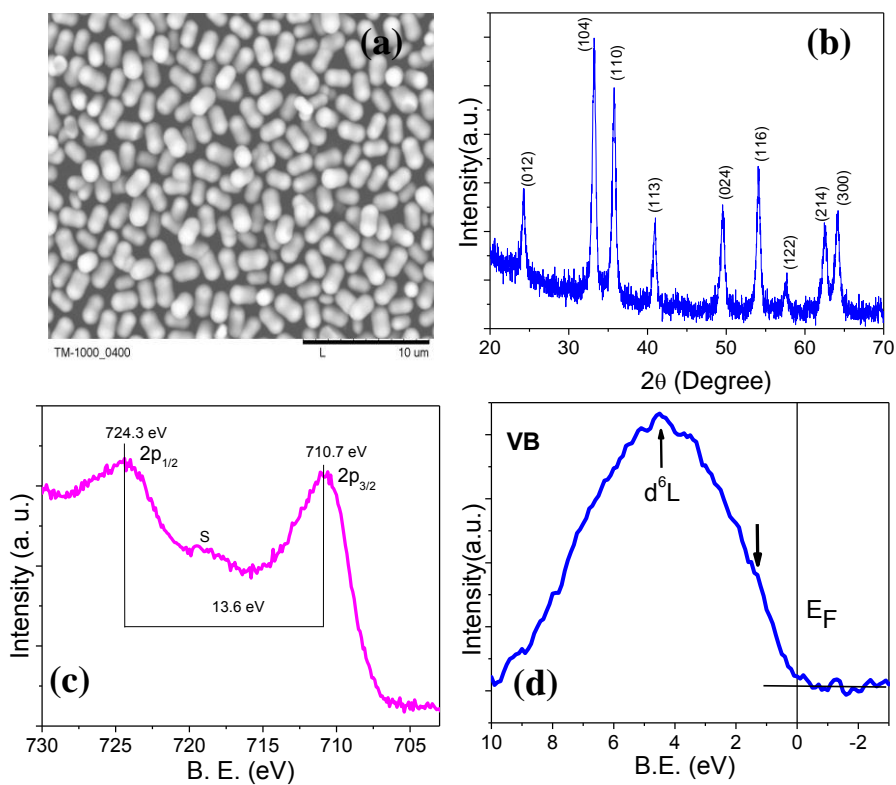

Fig. S1: (a) SEM microstructure, (b) XRD data, (c) Fe 2p spectrum and (d) VB spectrum of synthesized  $\alpha$ -Fe<sub>2</sub>O<sub>3</sub> particle

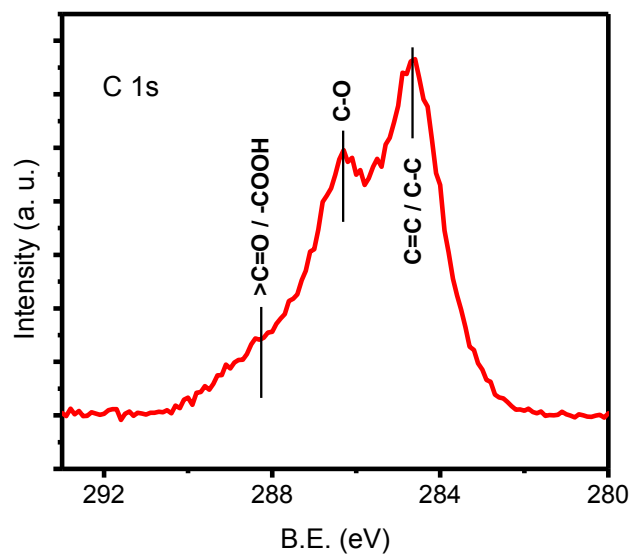

Fig. S2: C 1s XPS spectrum of GO

Table I - Comparison of electrical conductivity of rGO obtained by two-step method (photocatalytic / vacuum annealing) with reported reduction methods.

| <b>Reduction method</b>                                | <b>Conductivity<br/>(S m<sup>-1</sup>)</b> | <b>Reference</b> |
|--------------------------------------------------------|--------------------------------------------|------------------|
| N <sub>2</sub> H <sub>4</sub>                          | 156.2                                      | Ref-17           |
| NaOH                                                   | 3.6                                        | Ref-17           |
| NaBH <sub>4</sub>                                      | 0.006                                      | Ref-17           |
| Solvothermal                                           | 4.8                                        | Ref-17           |
| High temperature                                       | 231.1                                      | Ref-17           |
| Vacuum annealing                                       | ~50                                        | Ref-51           |
| Two-step (Reduction / high temperature annealing)      | 267.8                                      | Ref-17           |
| Two-step (Photocatalytic reduction / vacuum annealing) | 2000                                       | Present<br>work  |
